# Supplementary material
Source: PubMed Central journal article supplement (PMC327196)
Supplement: pnas_101_2_615__3.pdf [file pnas_101_2_615__3.pdf]

**Table 1. Genes and sequences of real-time quantitative RT-PCR primers of measured gene transcripts**

| <b>HUGO_Name</b>                                                                     | <b>Accession no. UniGene</b> | <b>Forward Primer (5'-3')</b> | <b>Reverse Primer (5'-3')</b> | <b>Length (bp)</b> |
|--------------------------------------------------------------------------------------|------------------------------|-------------------------------|-------------------------------|--------------------|
| Glyceraldehyde-3-phosphate dehydrogenase                                             | NM_002046 Hs.169476          | GAAGGTGAAGGTCCGAGTC           | GAAGATGGTGATGGGATTTC          | 226                |
| Kallikrein 3, (prostate specific antigen)                                            | NM_001648 Hs.171995          | TGGTGCTGCACCCCTCAT            | CCAGGGTTGGGAATGCTTCT          | 70                 |
| Tropomyosin 1 (alpha)                                                                | NM_000366 Hs.77899           | GAAGATGCCGACCGCAAAT           | CGTTCAGGTCCGCTCTCAAT          | 68                 |
| Actin, alpha 2, smooth muscle, aorta                                                 | NM_001613 Hs.195851          | TGGTCATCCTCCCTTGAGAAGA        | CGTTCATTTCCGATGGTGATC         | 68                 |
| Collagen, type I, alpha 1                                                            | NM_000088 Hs.172928          | GGCTTCCCTGGTCCCTTG            | GGGACCACGTTCACTTGG            | 78                 |
| Hepsin (transmembrane protease, serine 1)                                            | NM_002151 Hs.823             | TTTGTGTGTGAGGACAGCATCTC       | GCCCCAACTCACAATGCC            | 66                 |
| MARCKS-like protein                                                                  | NM_023009 Hs.75061           | GCGCTGAGCAGAATGAGTAGCT        | ACCTCACAAGGACAGCACAGTTT       | 79                 |
| LIM                                                                                  | NM_006457 Hs.154103          | CCTGGAAGCTCTGGGCTACAC         | TTCCAAACTTTCACAACACTGA        | 70                 |
| Thymosin, beta 4, Y chromosome                                                       | NM_004202 Hs.159201          | GCGACCTGGGCTCCATTT            | AGCCACTTCCGCGTTCAAG           | 63                 |
| Kallikrein 2, prostatic                                                              | NM_005551 Hs.181350          | CGTGCCCTCATCCAGTCT            | GCCAGGGTTGGGAATGCT            | 65                 |
| Acid phosphatase, prostate                                                           | NM_001099 Hs.1852            | TTTCTCAGGGCAGATGATGCT         | AAGCCCATTTTCTCAAAGCT          | 71                 |
| keratin 15                                                                           | NM_002275 Hs.80342           | CTCCAGTCCCTGCCTTCAGA          | GCATGCAAAGCCCTGAAATAA         | 66                 |
| Keratin 5 (epidermolysis bullosa simplex, Dowling-Meara/Kobner/Weber-Cockayne types) | NM_000424 Hs.433845          | CACAGAGATGAACCGGATGATC        | TTGGCGCACTGTTTCTTGAC          | 69                 |
| Prostaglandin D2 synthase (21kD, brain)                                              | NM_000954 Hs.8272            | GGGCTTCACAGAGGATACCATT        | AGTCCTATTGTTCCGTCATGCA        | 68                 |
| CD44 antigen (homing function and Indian blood group system)                         | NM_000610 Hs.169610          | CCTCTGCAAGGCTTTCAATAGC        | CGATGCTCAGAGCTTTCTCCAT        | 65                 |
| Tropomyosin 2 (beta)                                                                 | NM_003289 Hs.300772          | CGAGAGCCGAGCCAGACA            | CTCTGAGGCCATCAGGGACTT         | 76                 |
| Desmin                                                                               | NM_001927 Hs.279604          | CCAGTCCTACACCTGCGAGATT        | CCTCCAATTCCCGCATCTG           | 77                 |
| Transforming growth factor, beta 1 (Camurati-                                        | NM_000660 Hs.1103            | CTCTCCGACCTGCCACAGA           | AACCTAGATGGGCGCGATCT          | 72                 |

| <b>HUGO_Name</b>                                   | <b>Accession no. UniGene</b> | <b>Forward Primer (5'-3')</b>        | <b>Reverse Primer (5'-3')</b> | <b>Length (bp)</b> |
|----------------------------------------------------|------------------------------|--------------------------------------|-------------------------------|--------------------|
| Engelmann disease)                                 |                              |                                      |                               |                    |
| Filamin A, alpha (actin binding protein 280)       | NM_001456 Hs.195464          | CAGGCTTGGTGTCTGCTTACG                | TCCCGCATTGCTCGTGTT            | 89                 |
| Myosin, light polypeptide 9, regulatory            | NM_006097 Hs.9615            | TTAAGGAGGCTTTCAACATGATTG             | GTCGTGCAGGTCCTCCTTGT          | 68                 |
| Myosin, heavy polypeptide 11, smooth muscle        | NM_002474 Hs.78344           | ACGGGAGAGCTGGAAAAGC                  | TTTTGGCGTTGCCGAAAG            | 67                 |
| Synaptogyrin 1                                     | NM_004711 Hs.6139            | CCAAAGGACAGCAGTGATGGA                | CCGGATTGGAAAATGAAGTCA         | 79                 |
| Eukaryotic translation elongation factor 1 alpha 1 | NM_001402 Hs.181165          | CTGAACCATCCAGGCCAAAT                 | GCCGTGTGGCAATCCAAT            | 59                 |
| Single-minded homolog 2 (Drosophila)               | NM_005069.2 Hs.27311         | TTTAGGACCGTGGGTCATGC                 | ATAGCTGAGTGCCTGGAGAGG         | 77                 |
| Alpha-methylacyl-CoA racemase                      | NM_014324.2 Hs.128749        | GTGAAACAGAGTGATTGGTTGCA              | GAATGTGCTTAGAGGGAGATCATGA     | 70                 |
| UDP-N-acteylglucosamine pyrophosphorylase 1        | NM_003115.2 Hs.21293         | CTCTCCTTATCTCCTATGCTGGA              | CGATGATTAGAGGTGCATGGAA        | 80                 |
| RAB4A, member RAS oncogene family                  | NM_004578.2 Hs.119007        | GAGACAGCTGAGGTCACCGC                 | ATTGTGTCCCAAATGCCACTG         | 104                |
| CD38 antigen (p45)                                 | NM_001775.1 Hs.66052         | CACCATAAAAGAGCTGGAATCGA              | GTGCAAGATGAATCCTCAGGATTT      | 120                |
| Homeo box A9                                       | NM_002142.3                  | GTAGTGGAATATGTCTTCTGTATAA<br>CTAGGCT | CATCCCCGAGAACAACCTTAAAATTT    | 108                |
| Tubulin, alpha 1 (testis specific)                 | NM_006000.1 Hs.75318         | TCTGTTTGCTGTTTCATGACCCT              | AAGAACCCCTTTGCAGGTCTC         | 65                 |
| Arachidonate 15-lipoxygenase, second type          | NM_001141.1 Hs.111256        | CATGCGAGGGCTTCATAGC                  | GATGCCCTCGAGATCTGG            | 197                |
