# Supplementary material
Source: PubMed Central journal article supplement (PMC327196)

## **b - Tubulin**

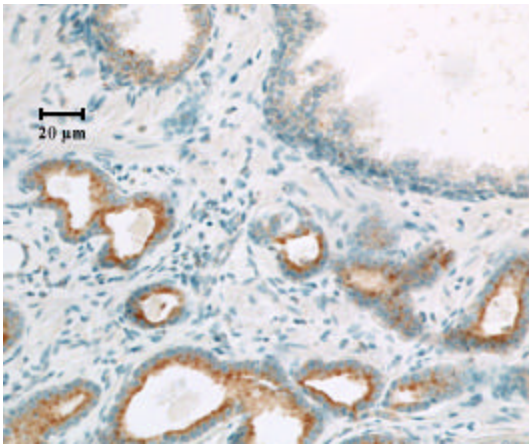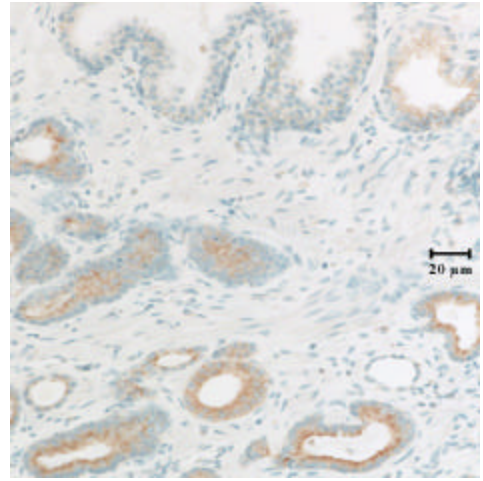

## **Prostate Specific Membrane Antigen**

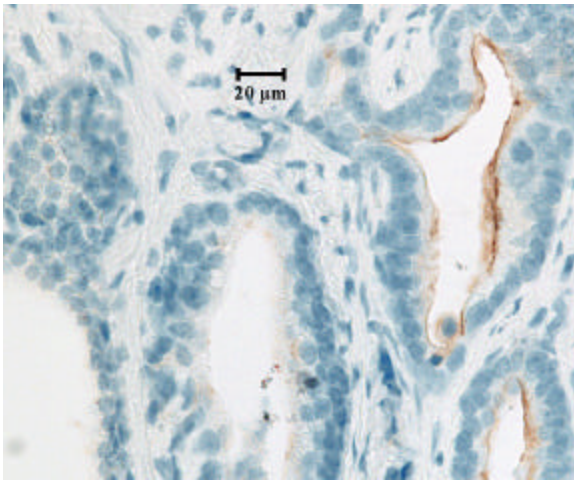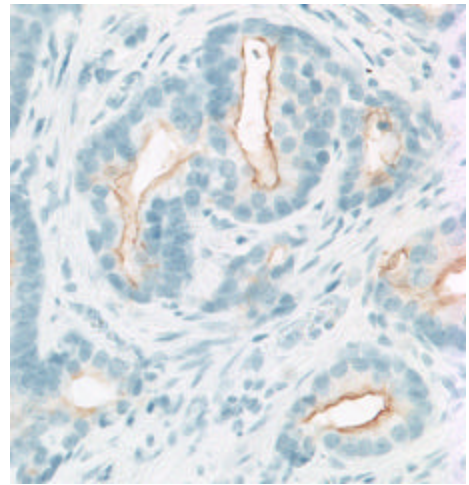

## **Prostaglandin D2 Synthase**

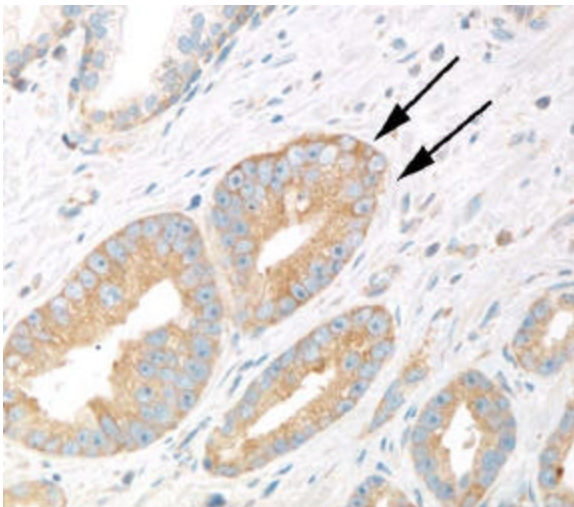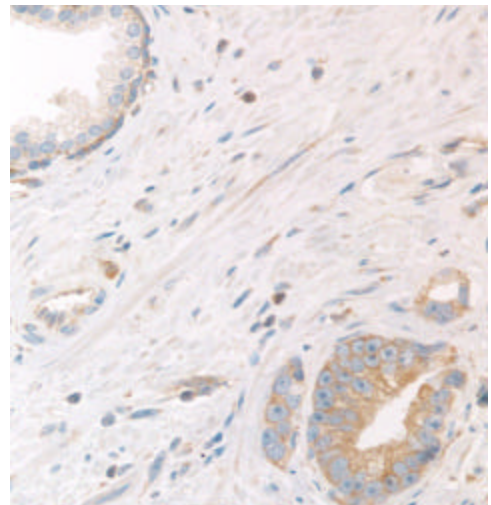

## Desmin

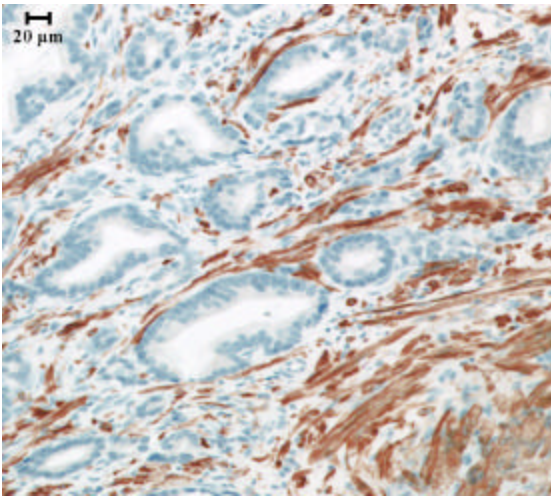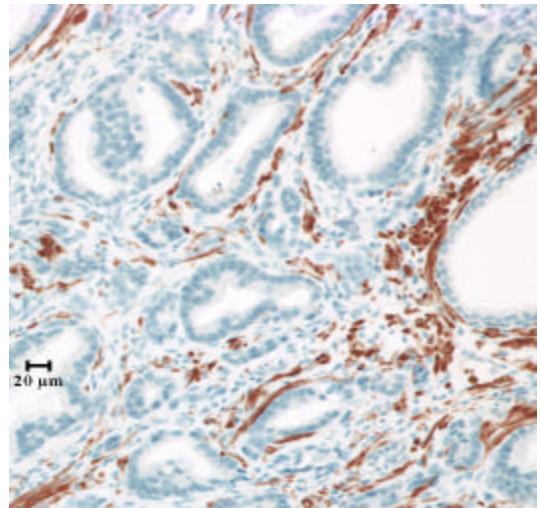

## Cytokeratin - 15

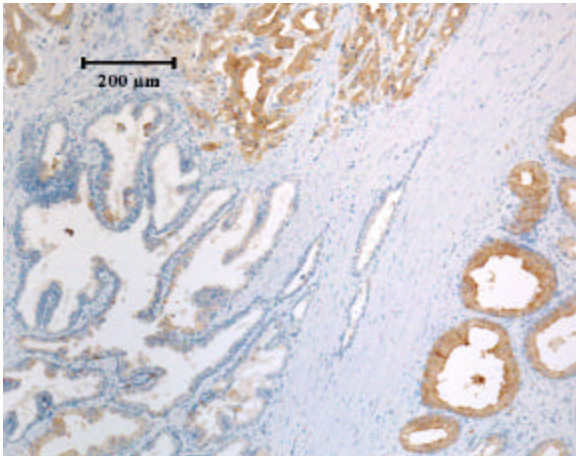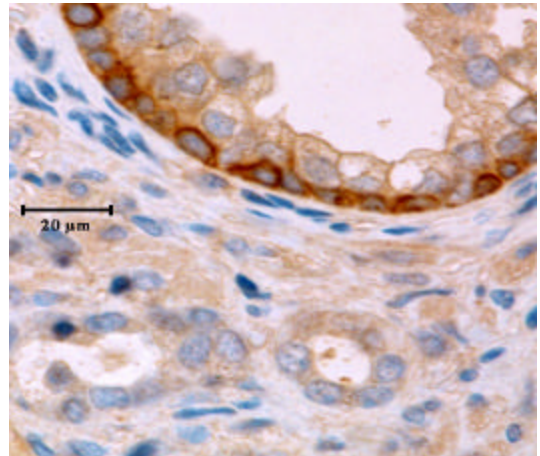

## Prostate Specific Antigen

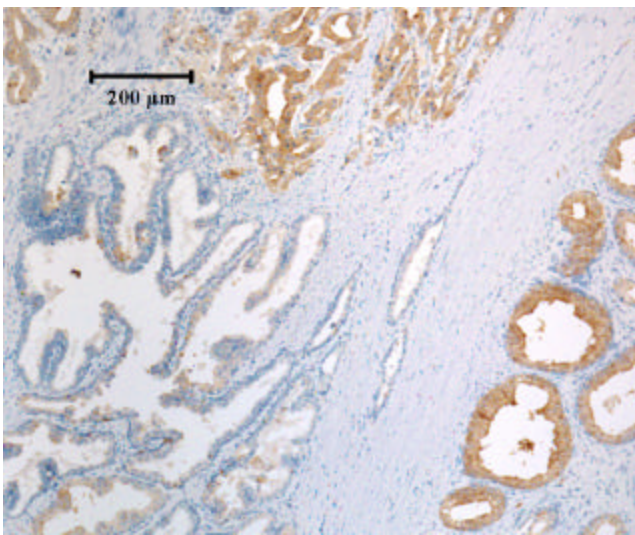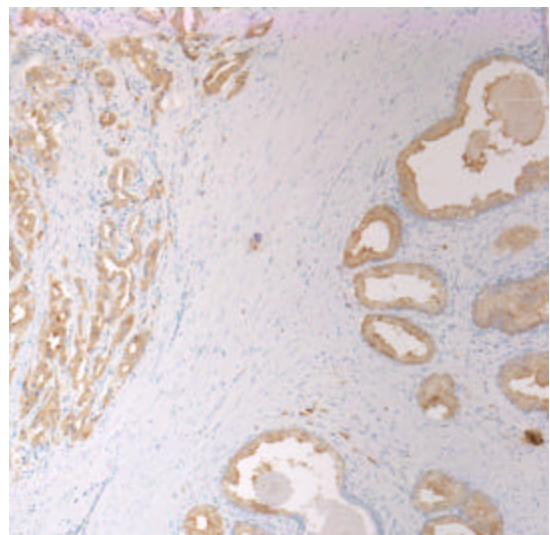

Supplement: pnas_2536479100_12.pdf [file pnas_2536479100_12.pdf]
