# Supplementary material
Source: PubMed Central journal article supplement (PMC327196)

**A**

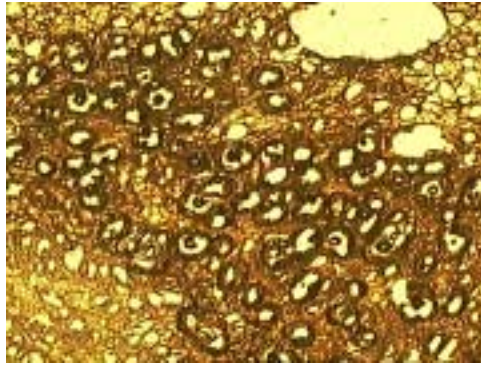

**B**

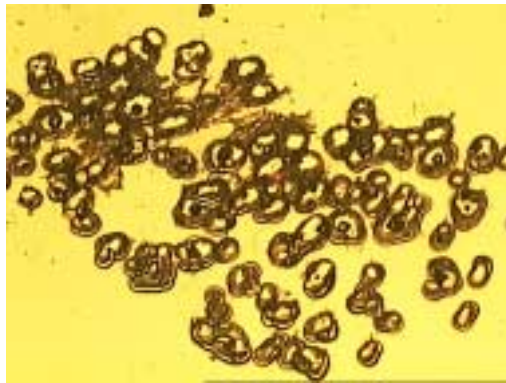

Supplement: pnas_2536479100_10.pdf [file pnas_2536479100_10.pdf]

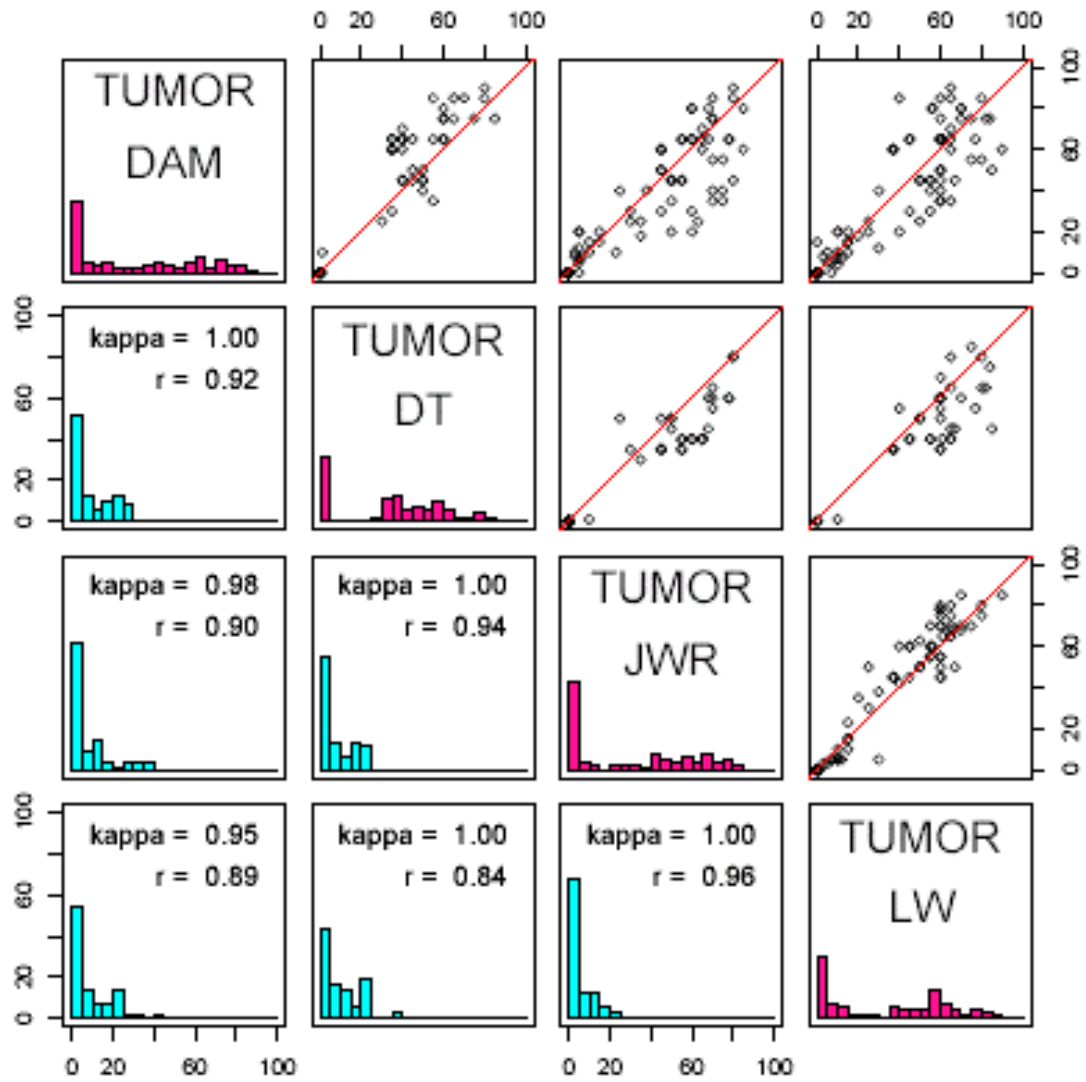

Supplement: pnas_2536479100_6.pdf [file pnas_2536479100_6.pdf]

### Correlation (loess) plot - simple regression

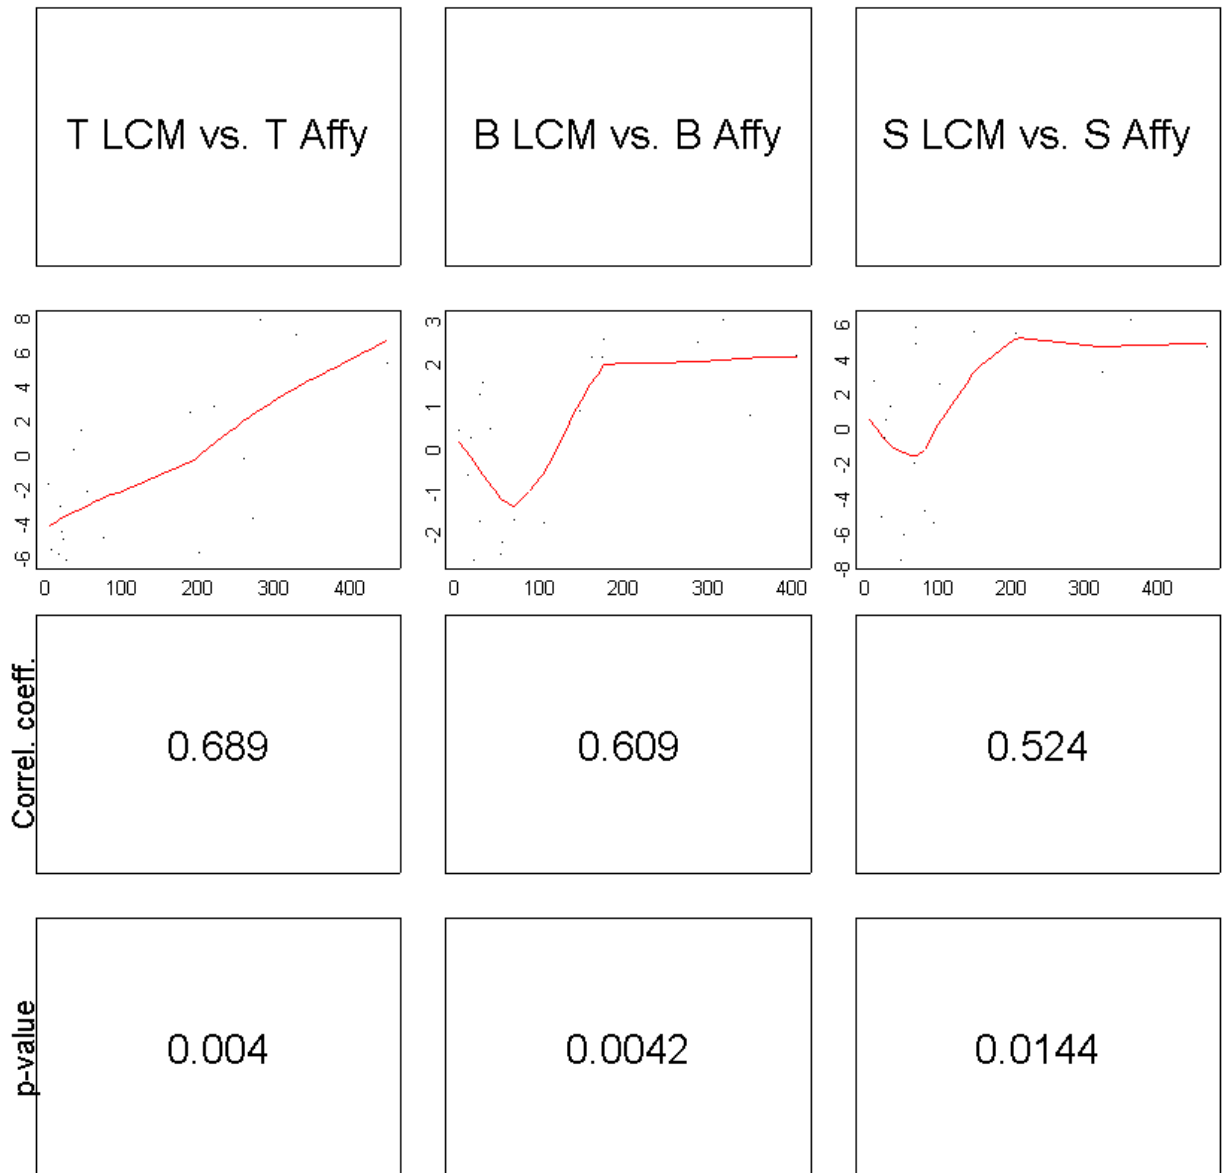

Supplement: pnas_2536479100_8.pdf [file pnas_2536479100_8.pdf]
